# Supplementary material for: Genome-wide associations and functional gene analyses for endoparasite resistance in an endangered population of native German Black Pied cattle
Source: PubMed Central journal article supplement (PMC6454736; doi:10.1186/s12864-019-5659-4), 2019-04-08

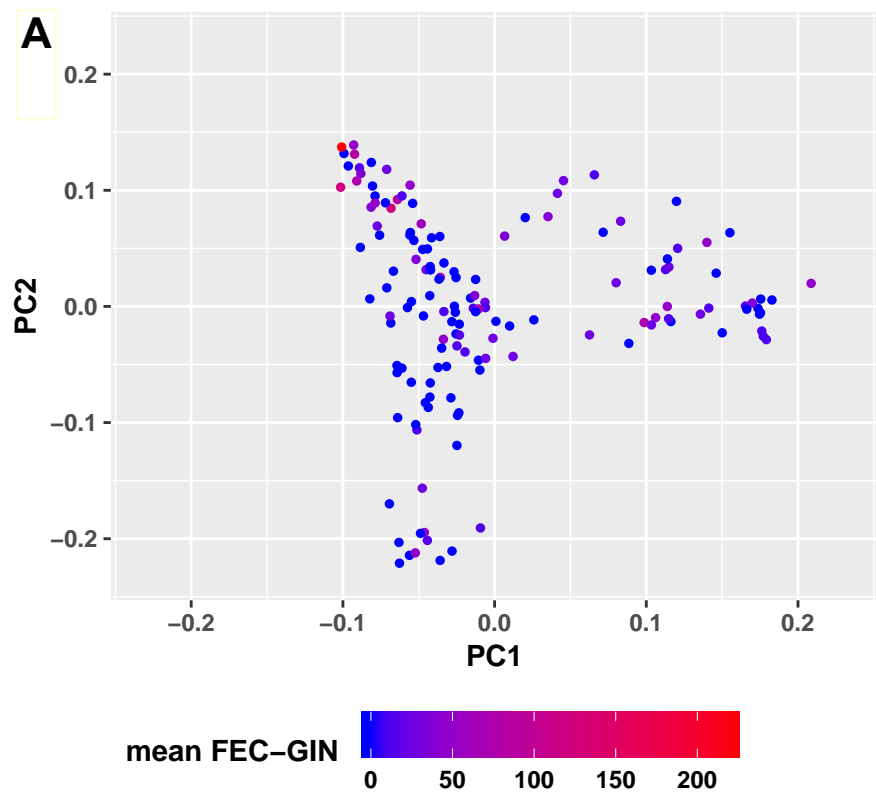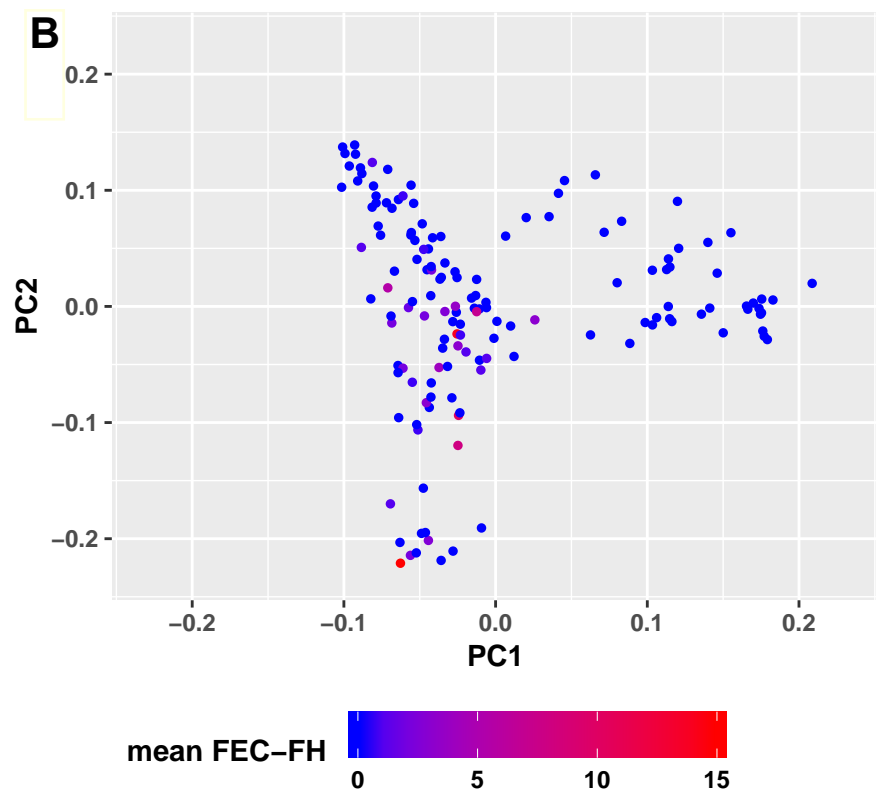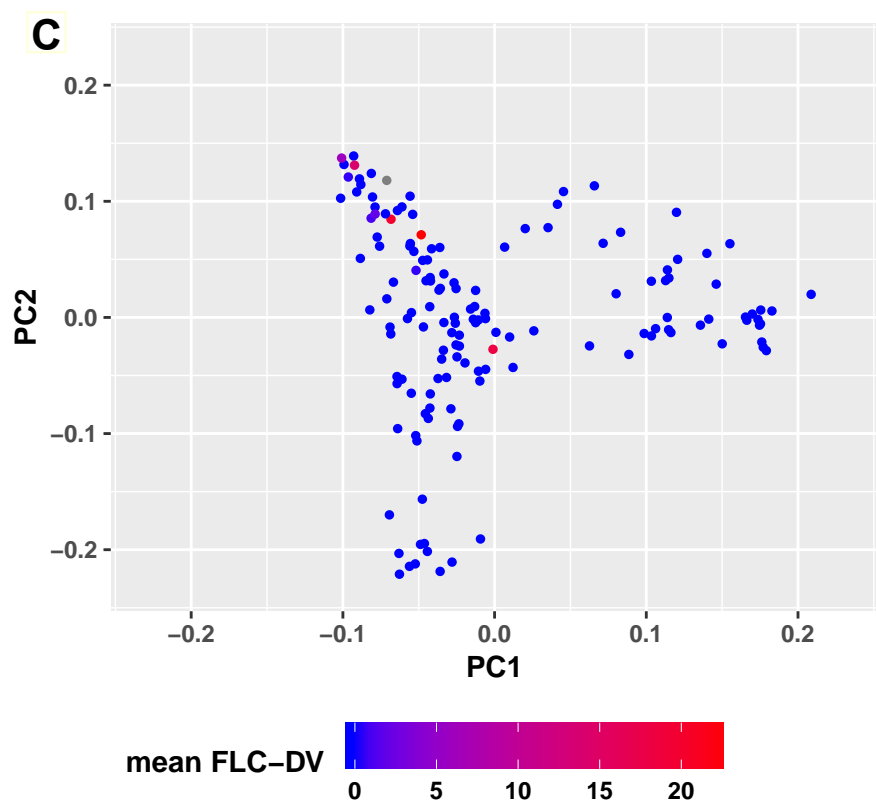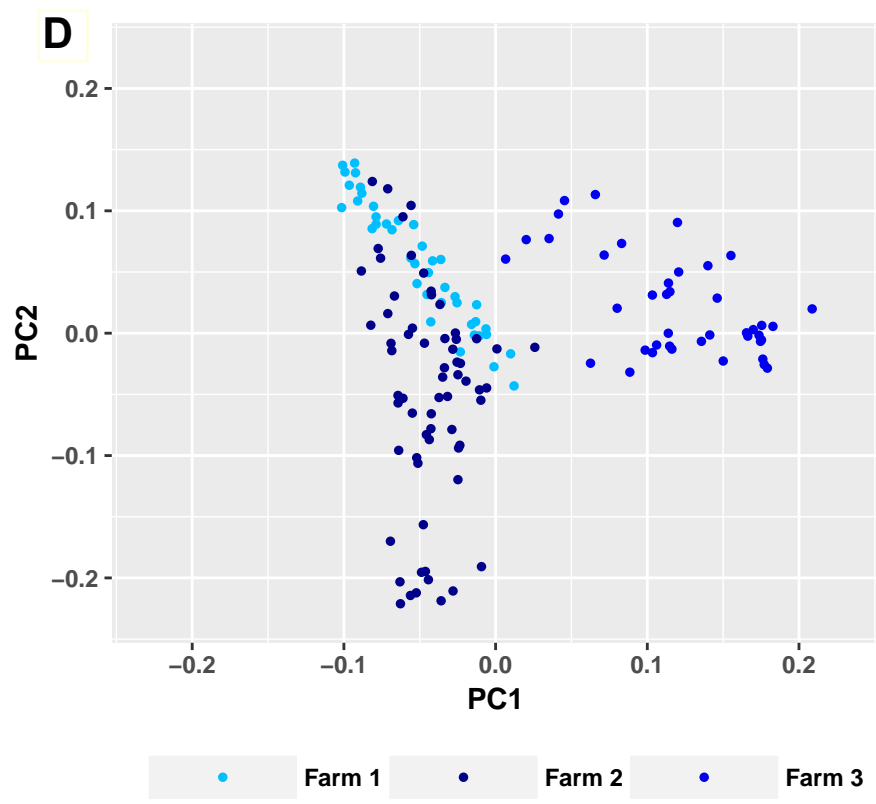

Supplement: 12864_2019_5659_MOESM2_ESM.pdf [file 12864_2019_5659_MOESM2_ESM.pdf]
